# Supplementary material for: Construction of a redox-active metal–organic framework with an octanuclear lithium one-dimensional building block
Source: Royal Society of Chemistry journal article supplement (doi:10.1039/d4cc02111h), 2024-01-01

## checkCIF/PLATON report

Structure factors have been supplied for datablock(s) Li8-MOF

THIS REPORT IS FOR GUIDANCE ONLY. IF USED AS PART OF A REVIEW PROCEDURE FOR PUBLICATION, IT SHOULD NOT REPLACE THE EXPERTISE OF AN EXPERIENCED CRYSTALLOGRAPHIC REFEREE.

No syntax errors found.      CIF dictionary      Interpreting this report

### Datablock: Li8-MOF

---

Bond precision:    C-C = 0.0044 Å                      Wavelength=0.71073

Cell:                      a=9.8956 (6)                      b=13.8451 (9)                      c=14.4170 (9)  
                                    alpha=95.736 (2)                      beta=94.844 (2)                      gamma=102.727 (2)

Temperature:        200 K

|                        | Calculated                                     | Reported           |
|------------------------|------------------------------------------------|--------------------|
| Volume                 | 1905.5(2)                                      | 1905.5(2)          |
| Space group            | P -1                                           | P -1               |
| Hall group             | -P 1                                           | -P 1               |
| Moiety formula         | 2(C37 H27 Li4 N3 O9), C3 H7<br>N O [+ solvent] | C77 H61 Li8 N7 O19 |
| Sum formula            | C77 H61 Li8 N7 O19 [+<br>solvent]              | C77 H61 Li8 N7 O19 |
| Mr                     | 1443.85                                        | 1443.84            |
| Dx, g cm <sup>-3</sup> | 1.258                                          | 1.258              |
| Z                      | 1                                              | 1                  |
| Mu (mm <sup>-1</sup> ) | 0.089                                          | 0.089              |
| F000                   | 748.0                                          | 748.0              |
| F000'                  | 748.38                                         |                    |
| h, k, lmax             | 11, 16, 16                                     | 11, 16, 16         |
| Nref                   | 6285                                           | 6261               |
| Tmin, Tmax             | 0.981, 0.982                                   | 0.981, 0.982       |
| Tmin'                  | 0.981                                          |                    |

Correction method= # Reported T Limits: Tmin=0.981 Tmax=0.982  
AbsCorr = NONE

Data completeness= 0.996

Theta (max)= 24.420

R(reflections)= 0.0664( 4709)

wR2(reflections)=  
0.2200( 6261)

S = 1.045

Npar= 556

---

The following ALERTS were generated. Each ALERT has the format  
**test-name\_ALERT\_alert-type\_alert-level.**  
Click on the hyperlinks for more details of the test.

---

**Alert level B**

PLAT097\_ALERT\_2\_B Large Reported Max. (Positive) Residual Density 1.02 eA-3

**Author Response: The residual Q peak is situated near the coordinated DMF, which appears to be somewhat disordered.**

---

**Alert level C**

DIFMX02\_ALERT\_1\_C The maximum difference density is > 0.1\*ZMAX\*0.75  
The relevant atom site should be identified.

THETM01\_ALERT\_3\_C The value of sine(theta\_max)/wavelength is less than 0.590  
Calculated sin(theta\_max)/wavelength = 0.5817

PLAT094\_ALERT\_2\_C Ratio of Maximum / Minimum Residual Density ... 2.64 Report

PLAT220\_ALERT\_2\_C NonSolvent Resd 1 C Ueq(max)/Ueq(min) Range 3.1 Ratio

PLAT220\_ALERT\_2\_C NonSolvent Resd 1 Li Ueq(max)/Ueq(min) Range 3.3 Ratio

PLAT242\_ALERT\_2\_C Low 'MainMol' Ueq as Compared to Neighbors of 01 Check

PLAT242\_ALERT\_2\_C Low 'MainMol' Ueq as Compared to Neighbors of C15 Check

PLAT334\_ALERT\_2\_C Small <C-C> Benzene Dist. C15 -C17 . 1.37 Ang.

PLAT340\_ALERT\_3\_C Low Bond Precision on C-C Bonds ..... 0.00435 Ang.

PLAT911\_ALERT\_3\_C Missing FCF Refl Between Thmin & STh/L= 0.582 21 Report

-2 0 3, -9 -2 7, -6 1 7, -7 2 7, -4 -1 8, -10 4 8,  
-7 11 9, -5 -3 10, -9 3 10, -8 4 10, 0-13 11, -5 -3 11,  
3-12 12, -5 -3 12, -8 1 12, -4 -9 13, -8 1 13, -6 -3 14,  
-5 -3 14, -7 -1 14, -5 4 15,

PLAT918\_ALERT\_3\_C Reflection(s) with I(obs) much Smaller I(calc) . 4 Check

---

**Alert level G**

PLAT002\_ALERT\_2\_G Number of Distance or Angle Restraints on AtSite 3 Note

PLAT003\_ALERT\_2\_G Number of Uiso or Uij Restrained non-H Atoms ... 6 Report

PLAT004\_ALERT\_5\_G Polymeric Structure Found with Maximum Dimension 3 Info

PLAT042\_ALERT\_1\_G Calc. and Reported MoietyFormula Strings Differ Please Check

Calc: 2(C37 H27 Li4 N3 O9), C3 H7 N O  
Rep.: C77 H61 Li8 N7 O19

PLAT066\_ALERT\_1\_G Predicted and Reported Tmin&Tmax Range Identical ? Check

PLAT072\_ALERT\_2\_G SHELXL First Parameter in WGHT Unusually Large 0.13 Report

PLAT154\_ALERT\_1\_G The s.u.'s on the Cell Angles are Equal ..(Note) 0.002 Degree

PLAT172\_ALERT\_4\_G The CIF-Embedded .res File Contains DFIX Records 3 Report

PLAT178\_ALERT\_4\_G The CIF-Embedded .res File Contains SIMU Records 1 Report

PLAT186\_ALERT\_4\_G The CIF-Embedded .res File Contains ISOR Records 1 Report

PLAT188\_ALERT\_3\_G A Non-default SIMU Restraint Value has been used 0.0100 Report

PLAT300\_ALERT\_4\_G Atom Site Occupancy of O10 Constrained at 0.5 Check

PLAT300\_ALERT\_4\_G Atom Site Occupancy of N4 Constrained at 0.5 Check

|                   |                                                      |                |        |        |
|-------------------|------------------------------------------------------|----------------|--------|--------|
| PLAT300_ALERT_4_G | Atom Site Occupancy of C35                           | Constrained at | 0.5    | Check  |
| PLAT300_ALERT_4_G | Atom Site Occupancy of C36                           | Constrained at | 0.5    | Check  |
| PLAT300_ALERT_4_G | Atom Site Occupancy of C37                           | Constrained at | 0.5    | Check  |
| PLAT300_ALERT_4_G | Atom Site Occupancy of H35                           | Constrained at | 0.5    | Check  |
| PLAT300_ALERT_4_G | Atom Site Occupancy of H36A                          | Constrained at | 0.5    | Check  |
| PLAT300_ALERT_4_G | Atom Site Occupancy of H36B                          | Constrained at | 0.5    | Check  |
| PLAT300_ALERT_4_G | Atom Site Occupancy of H36C                          | Constrained at | 0.5    | Check  |
| PLAT300_ALERT_4_G | Atom Site Occupancy of H37A                          | Constrained at | 0.5    | Check  |
| PLAT300_ALERT_4_G | Atom Site Occupancy of H37B                          | Constrained at | 0.5    | Check  |
| PLAT300_ALERT_4_G | Atom Site Occupancy of H37C                          | Constrained at | 0.5    | Check  |
| PLAT301_ALERT_3_G | Main Residue Disorder .....                          | (Resd 1)       | 6%     | Note   |
| PLAT302_ALERT_4_G | Anion/Solvent/Minor-Residue Disorder                 | (Resd 2)       | 100%   | Note   |
| PLAT398_ALERT_2_G | Deviating C-O-C Angle From 120 for O9                | .              | 60.3   | Degree |
| PLAT605_ALERT_4_G | Largest Solvent Accessible VOID in the Structure     |                | 45     | A**3   |
| PLAT764_ALERT_4_G | Overcomplete CIF Bond List Detected (Rep/Expd)       | .              | 1.11   | Ratio  |
| PLAT779_ALERT_4_G | Suspect or Irrelevant (Bond) Angle(s) in CIF ...     |                | 40.96  | Deg.   |
|                   | O6 -C25 -LI4 1_555 1_555 2_567 .....                 | # 124          |        | Check  |
| PLAT860_ALERT_3_G | Number of Least-Squares Restraints .....             |                | 63     | Note   |
| PLAT868_ALERT_4_G | ALERTS Due to the Use of _smtbx_masks                | Suppressed     | !      | Info   |
| PLAT883_ALERT_1_G | No Info/Value for _atom_sites_solution_primary       | .              | Please | Do !   |
| PLAT909_ALERT_3_G | Percentage of I>2sig(I) Data at Theta(Max) Still     |                | 48%    | Note   |
| PLAT910_ALERT_3_G | Missing # of FCF Reflection(s) Below Theta(Min).     |                | 2      | Note   |
|                   | 0 1 0, 0 0 1,                                        |                |        |        |
| PLAT941_ALERT_3_G | Average HKL Measurement Multiplicity .....           |                | 4.6    | Low    |
| PLAT969_ALERT_5_G | The 'Henn et al.' R-Factor-gap value .....           |                | 4.23   | Note   |
|                   | Predicted wR2: Based on SigI**2 5.20 or SHELX Weight | 22.06          |        |        |
| PLAT978_ALERT_2_G | Number C-C Bonds with Positive Residual Density.     |                | 1      | Info   |
| PLAT992_ALERT_5_G | Repd & Actual _reflns_number_gt Values Differ by     |                | 2      | Check  |

---

0 **ALERT level A** = Most likely a serious problem - resolve or explain  
1 **ALERT level B** = A potentially serious problem, consider carefully  
11 **ALERT level C** = Check. Ensure it is not caused by an omission or oversight  
38 **ALERT level G** = General information/check it is not something unexpected

5 ALERT type 1 CIF construction/syntax error, inconsistent or missing data  
12 ALERT type 2 Indicator that the structure model may be wrong or deficient  
10 ALERT type 3 Indicator that the structure quality may be low  
20 ALERT type 4 Improvement, methodology, query or suggestion  
3 ALERT type 5 Informative message, check

---

It is advisable to attempt to resolve as many as possible of the alerts in all categories. Often the minor alerts point to easily fixed oversights, errors and omissions in your CIF or refinement strategy, so attention to these fine details can be worthwhile. In order to resolve some of the more serious problems it may be necessary to carry out additional measurements or structure refinements. However, the purpose of your study may justify the reported deviations and the more serious of these should normally be commented upon in the discussion or experimental section of a paper or in the "special\_details" fields of the CIF. checkCIF was carefully designed to identify outliers and unusual parameters, but every test has its limitations and alerts that are not important in a particular case may appear. Conversely, the absence of alerts does not guarantee there are no aspects of the results needing attention. It is up to the individual to critically assess their own results and, if necessary, seek expert advice.

### **Publication of your CIF in IUCr journals**

A basic structural check has been run on your CIF. These basic checks will be run on all CIFs submitted for publication in IUCr journals (*Acta Crystallographica*, *Journal of Applied Crystallography*, *Journal of Synchrotron Radiation*); however, if you intend to submit to *Acta Crystallographica Section C* or *E* or *IUCrData*, you should make sure that full publication checks are run on the final version of your CIF prior to submission.

### **Publication of your CIF in other journals**

Please refer to the *Notes for Authors* of the relevant journal for any special instructions relating to CIF submission.

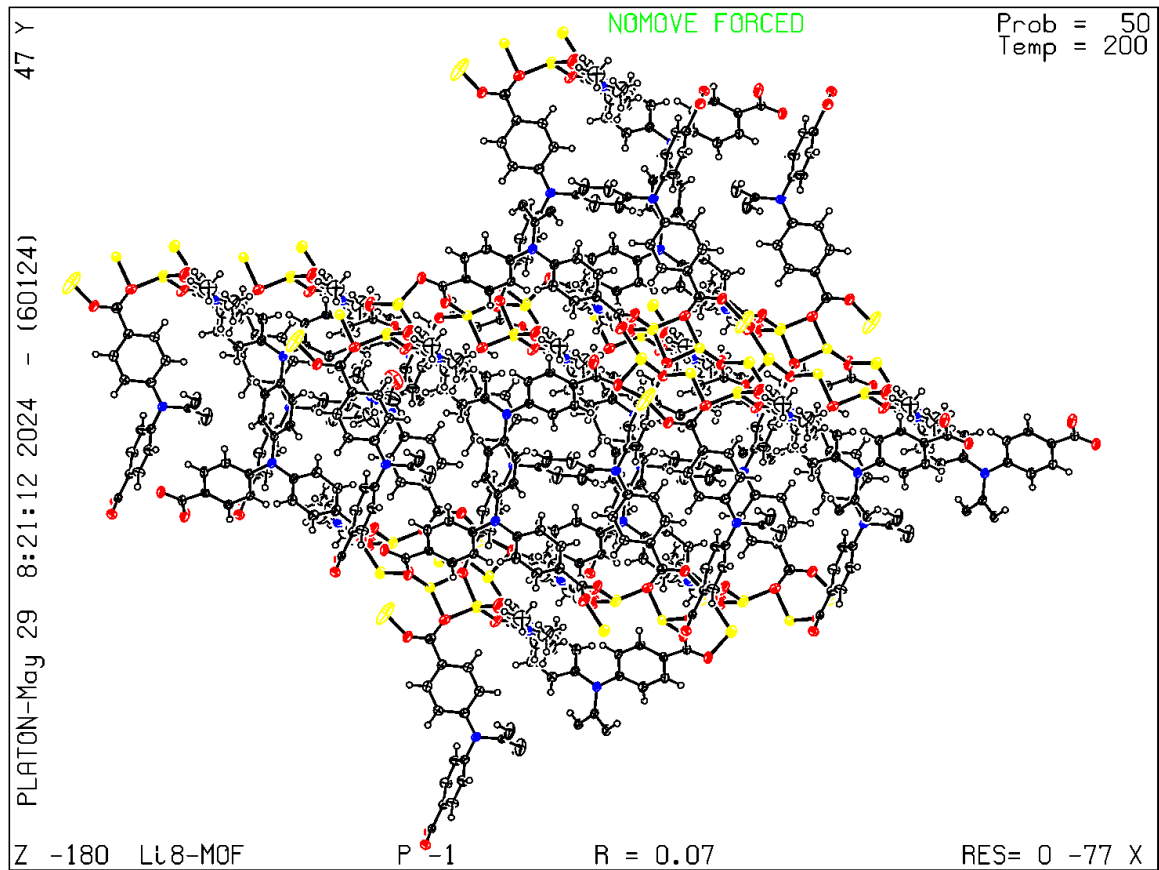

Supplement: d4cc02111h1.pdf [file d4cc02111h1.pdf]
