# Supplementary material for: Construction of a redox-active metal–organic framework with an octanuclear lithium one-dimensional building block
Source: Royal Society of Chemistry journal article supplement (doi:10.1039/d4cc02111h), 2024-01-01
Supplement: d4cc02111h2.pdf [file d4cc02111h2.pdf]

## Supplementary Information

### **Construction of a redox-active metal–organic framework with an octanuclear lithium one-dimensional building block**

Shu-Fan Li,<sup>[a]</sup> Ya-Ru Meng,<sup>[a]</sup> Min-Jie Xu,<sup>[a]</sup> Gen Zhang<sup>\*[a]</sup> and Jian Su,<sup>\*[a]</sup>

<sup>a</sup> School of Chemical Engineering, Nanjing University of Science and Technology, Nanjing, Jiangsu 210094, China.

E-mail: [zhanggen@njust.edu.cn](mailto:zhanggen@njust.edu.cn); [sujian@njust.edu.cn](mailto:sujian@njust.edu.cn)

## Experimental Procedures

### Materials and Characterization

#### Materials.

All the chemicals are commercially available, and used without further purification. LiNO<sub>3</sub> (Shanghai Macklin Biochemical Co., Ltd), N, N, N', N'-tetrakis(4-carboxyphenyl)-1,4-phenylenediamine (H<sub>4</sub>TCPPDA) (97%, Shanghai Tengqian Biotechnology Co., Ltd), CH<sub>3</sub>OH (Shanghai Aladdin Biochemical Technology Co., Ltd.), N, N-dimethylformamide (DMF) (Nanjing reagent Co., Ltd), and H<sub>2</sub>O (Deionized water).

#### Characterization.

**Powder X-ray diffraction (PXRD):** PXRD patterns were acquired on a Bruker D8 ADVANCE diffractometer at room temperature.

**Fourier transform infrared (FT-IR):** IR spectra were measured on a Thermo Fisher Scientific Optics NICOLETIS20.

**Scanning electron microscope (SEM):** SEM images were collected using a JSM-7800F PRIME system.

**Transmission electron microscope (TEM):** TEM images were obtained with a JEM-2100Plus, JEOL.

**Thermogravimetric analysis (TGA):** TGA were recorded on TGA/SDTA851E under flowing N<sub>2</sub> with 10 K min<sup>-1</sup> ramp rate.

**Ultraviolet-visible-near-infrared light absorption spectra (UV-vis-NIR):** The UV-vis spectra were collected using EVOLUTION220.

**Electron paramagnetic resonance (EPR):** The EPR spectra were obtained with a Bruker EMX-10/12 X-band (Li<sub>8</sub>-MOF and Ag NPs@Li<sub>8</sub>-MOF) and EPR200-Plus (Li<sub>8</sub>-MOF recorded during spectroelectrochemistry) at room temperature.

**X-ray photoelectron spectroscopy (XPS):** The xps data were tested by PHI QUANTERA II (Japan vacuum) instrument. X-ray photoelectron spectrometer using standard and monochromatic Al K $\alpha$  radiation. The binding energies from the spectra were calibrated against the C 1s peak located at 284.6 eV.

**Cyclic voltammetry (CV) and differential pulse voltammetry (DPV):** The CV and DPV data were obtained by using a CH Instrument CHI760E electrochemical Analyzer. Measurements were performed in a three-electrode system. Glassy carbon was used as the working electrode, platinum wire as an auxiliary electrode and Ag/AgCl as a reference electrode. The Li<sub>8</sub>-MOF was grinded and coated on glassy carbon electrode. The electrolyte is 0.1 M (C<sub>2</sub>H<sub>5</sub>)<sub>4</sub>N<sup>+</sup>PF<sub>6</sub><sup>-</sup>/DMF.

**Spectroelectrochemistry:** Spectroelectrochemistry spectra results of Li<sub>8</sub>-MOF on ITO were obtained by CHI760E electrochemical Analyzer and UV-Vis spectrometer EVOLUTION220. Measurements were performed in a three-electrode system (Figure S23) and the electrolyte is 0.1 M (C<sub>2</sub>H<sub>5</sub>)<sub>4</sub>N<sup>+</sup>PF<sub>6</sub><sup>-</sup>/DMF.

### Synthesis of Li<sub>8</sub>-MOF.

LiNO<sub>3</sub> (15 mg, 0.218 mmol) and H<sub>4</sub>TCPPDA (5 mg, 0.008 mmol) were dissolved with N, N-dimethylformamide (DMF, 1.5 mL) and H<sub>2</sub>O (0.25 mL) in a 10 mL glass vial. The vial was sonicated for 5 min and incubated at 135 °C for 3 days. The light yellow strip crystals were crystallized and collected by filtration (based on 75 % yield of H<sub>4</sub>TCPPDA). Analysis calcd (%) for C<sub>77</sub>H<sub>61</sub>Li<sub>8</sub>N<sub>7</sub>O<sub>19</sub>: C 64.05; H 4.26; N 6.79. Found: C 57.97; H 4.15; N 6.13. It is well known that MOFs, as porous crystalline materials, trap guest molecules. Therefore, it is difficult to fit the EA data accurately. <sup>[1]</sup> FT-IR (cm<sup>-1</sup>): 1674 (s), 1635 (w), 1589 (vs), 1540 (m), 1502 (s), 1386 (vs), 1303 (m), 1258 (m), 1176 (m), 1147 (w), 1101 (s), 1062 (vw), 1014 (vw), 960 (vw), 923 (vw), 841 (m), 785 (vs), 705 (s), 672 (s), 634 (w), 566 (w), 541(w).

### Fabrication of electrode (Li<sub>8</sub>-MOF on ITO glass).

Take 10 mg of Li<sub>8</sub>-MOF for grinding, then add 200 μL of dichloromethane, sonicate for 20 minutes and leave it to stand. Clean the ITO glass substrate (size 2 × 1 cm) by immersing it in petroleum ether, acetone, and ethanol, followed by sonication for 20 minutes. Apply the top layer of the suspension onto the ITO glass and allow it to dry at room temperature.

### Single Crystal Structure Studies.

Single-crystal X-ray diffraction intensity data was collected on a Bruker D8 Quest single-crystal X-ray diffractometer outfitted with a PHOTON-3 CMOS detector using Incoatec IμS microfocus Mo source (3rd generation) ( $\lambda = 0.71073 \text{ \AA}$ ) at 200 K. The raw data collection, transformation, and reduction were accomplished by APEX3 software<sup>[2]</sup>. Adsorption corrections were carried out using the SADABS routine. The structures were solved by direct methods and refined by full-matrix least-squares on F<sup>2</sup> using the SHELXTL software package<sup>[3]</sup>. Non-hydrogen atoms were refined with anisotropic displacement parameters during the final cycles. Hydrogen atoms of TCPPDA<sup>4-</sup> were positioned at calculated ideal positions with isotropic displacement parameters. The free solvent molecules were highly disordered and impossible to locate and refine. The diffuse electron densities resulting from these residual solvent molecules were removed from the data set using the SQUEEZE routine of PLATON and refined further using the data generated<sup>[4]</sup>. The solvent contents are not represented in the unit cell formula in the crystal data. The final formula of Li<sub>8</sub>-MOF was calculated from the SQUEEZE results, charge balance, and TGA data. The X-ray crystallographic coordinates for structures reported in this article have been deposited at the Cambridge Crystallographic Data Centre (CCDC), under deposition numbers CCDC 2351585 for compounds Li<sub>8</sub>-MOF. These data can be obtained free of charge from the Cambridge Crystallographic Data Centre via [www.ccdc.cam.ac.uk/data\\_request/cif](http://www.ccdc.cam.ac.uk/data_request/cif). All relevant data supporting the findings of this study are available from the corresponding authors upon request

**Table S1** Selected bond lengths (Å) and angles (°) of Li<sub>8</sub>-MOF.

|                                       |           |                                       |           |
|---------------------------------------|-----------|---------------------------------------|-----------|
| O1-Li3                                | 1.834(9)  | O2-Li1                                | 1.933(6)  |
| O2-Li2                                | 1.916(6)  | O3-Li1                                | 1.898(7)  |
| O4-Li3 <sup>1</sup>                   | 1.937(9)  | O4-Li4                                | 1.932(7)  |
| O5-Li2 <sup>2</sup>                   | 1.926(6)  | Li3-O10                               | 2.544(17) |
| O5-Li3 <sup>2</sup>                   | 2.453(14) | Li4-O6 <sup>5</sup>                   | 1.995(7)  |
| O5-Li4 <sup>3</sup>                   | 1.999(6)  | O8-Li4 <sup>6</sup>                   | 1.919(7)  |
| O6-Li3 <sup>4</sup>                   | 1.932(9)  | O8-Li2 <sup>7</sup>                   | 1.924(6)  |
| O6-Li4 <sup>5</sup>                   | 1.995(7)  | Li1-O9                                | 1.962(7)  |
| Li2-O5 <sup>2</sup>                   | 1.926(6)  | O7-Li2 <sup>6</sup>                   | 1.938(6)  |
| O7-Li1 <sup>6</sup>                   | 1.960(7)  | O1-Li3 -O5 <sup>2</sup>               | 102.2(5)  |
| O1-Li3 -O10                           | 82.6(5)   | O1-Li3 -O6 <sup>10</sup>              | 123.7(5)  |
| O3-Li1 -O7 <sup>8</sup>               | 116.2(3)  | O4-Li4-O6 <sup>5</sup>                | 105.6(3)  |
| O3-Li1 -O9                            | 106.6(3)  | O4 <sup>9</sup> -Li3-O5 <sup>2</sup>  | 93.1(5)   |
| O7 <sup>8</sup> -Li1-O9               | 108.2(3)  | O4 <sup>9</sup> -Li3-O10              | 88.9(5)   |
| O2-Li2-O5 <sup>2</sup>                | 115.5(3)  | O6 <sup>5</sup> -Li4-O5 <sup>11</sup> | 101.0(3)  |
| O2-Li2-O7 <sup>8</sup>                | 92.9(3)   | O8 <sup>8</sup> -Li4-O4               | 131.7(3)  |
| O2-Li2-O8 <sup>7</sup>                | 113.3(3)  | O5 <sup>2</sup> -Li3-O10              | 172.3(5)  |
| O5 <sup>2</sup> -Li2-O7 <sup>8</sup>  | 122.8(3)  | O6 <sup>10</sup> -Li3-O4 <sup>9</sup> | 109.5(4)  |
| O8 <sup>7</sup> -Li2-O5 <sup>2</sup>  | 92.5(3)   | O6 <sup>10</sup> -Li3-O5 <sup>2</sup> | 88.5(4)   |
| O8 <sup>7</sup> -Li2-O7 <sup>8</sup>  | 121.6(3)  | O6 <sup>10</sup> -Li3-O10             | 83.8(5)   |
| O1-Li3 -O4 <sup>9</sup>               | 124.6(5)  | O4-Li4-O5 <sup>11</sup>               | 117.2(3)  |
| O2-Li1 -O7 <sup>8</sup>               | 91.8(3)   | O2-Li1 -O9                            | 106.2(3)  |
| O3-Li1-O2                             | 126.4(4)  | O8 <sup>8</sup> -Li4-O6 <sup>5</sup>  | 106.9(3)  |
| O8 <sup>8</sup> -Li4-O5 <sup>11</sup> | 90.4(3)   |                                       |           |

Symmetry codes: <sup>1</sup> -1+X,+Y,+Z; <sup>2</sup> 1-X,1-Y,2-Z; <sup>3</sup> +X,1+Y,+Z; <sup>4</sup> -1+X,1+Y,+Z; <sup>5</sup> -X,1-Y,2-Z; <sup>6</sup> +X,+Y,-1+Z; <sup>7</sup> 1-X,-Y,1-Z; <sup>8</sup> +X,+Y,1+Z; <sup>9</sup> 1+X,+Y,+Z; <sup>10</sup> 1+X,-1+Y,+Z; <sup>11</sup> +X,-1+Y,+Z.

**Table S2** Crystal data and structure refinements for Li<sub>8</sub>-MOF.

|                                                 | Li <sub>8</sub> -MOF                                                                                                      |
|-------------------------------------------------|---------------------------------------------------------------------------------------------------------------------------|
| Empirical formula                               | 2(C <sub>34</sub> H <sub>20</sub> Li <sub>4</sub> N <sub>2</sub> O <sub>8</sub> ),<br>3(C <sub>3</sub> H <sub>7</sub> NO) |
| Formula weight                                  | 1443.84                                                                                                                   |
| Temperature (K)                                 | 200                                                                                                                       |
| Crystal system                                  | triclinic                                                                                                                 |
| Wavelength (Å)                                  | 0.71073                                                                                                                   |
| Space group                                     | <i>P</i> -1                                                                                                               |
| a (Å)                                           | 9.8956(6)                                                                                                                 |
| b (Å)                                           | 13.8451(9)                                                                                                                |
| c (Å)                                           | 14.4170(9)                                                                                                                |
| α (°)                                           | 95.736(2)                                                                                                                 |
| β (°)                                           | 94.844(2)                                                                                                                 |
| γ (°)                                           | 102.727(2)                                                                                                                |
| Volume (Å <sup>3</sup> )                        | 1905.5(2)                                                                                                                 |
| Z                                               | 1                                                                                                                         |
| Calculated density (gcm <sup>-3</sup> )         | 1.258                                                                                                                     |
| F(000)                                          | 748.0                                                                                                                     |
| Absorption coe. μ/mm <sup>-1</sup>              | 0.089                                                                                                                     |
| No. of reflections measured                     | 28945                                                                                                                     |
| No. of independent reflections                  | 6261                                                                                                                      |
| θ (°)                                           | 1.954 - 24.420                                                                                                            |
| R <sub>int</sub>                                | 0.0691                                                                                                                    |
| R <sub>1</sub> , wR <sub>2</sub> [ I  ≥ 2σ(I)]  | 0.0664 / 0.1979                                                                                                           |
| R <sub>1</sub> , wR <sub>2</sub> [all data]     | 0.0874 / 0.2200                                                                                                           |
| GOF                                             | 1.045                                                                                                                     |
| Largest diff. peak and hole (eÅ <sup>-3</sup> ) | 1.023 / -0.388                                                                                                            |
| CCDC number                                     | 2351585                                                                                                                   |

**Table S3** Composition of SBUs and ligands of Li-MOF.

| name                                                                                                                                       | SBU                                                                        | ligand                 | ref       |
|--------------------------------------------------------------------------------------------------------------------------------------------|----------------------------------------------------------------------------|------------------------|-----------|
| IMP-22                                                                                                                                     | 1D Li <sub>8</sub> -based SBU                                              | Di-carboxylic acid     | 5         |
| IMP-24                                                                                                                                     | Right-handed helical Li <sup>+</sup> -based chains                         | Tri-carboxylic acid    | 5         |
| [(Li <sup>+</sup> )(C <sub>6</sub> H <sub>4</sub> NO <sub>2</sub> <sup>-</sup> )]·0.5DMF                                                   | Chain consists of alternating four-membered rings and eight-membered rings | Mono-carboxylic acid   | 6         |
| [Li <sub>2</sub> (H <sub>2</sub> pm)]·C <sub>4</sub> H <sub>8</sub> O <sub>2</sub> (1)                                                     | helical chain                                                              | Tetra- carboxylic acid | 7         |
| [Li <sub>2</sub> (H <sub>2</sub> pm)] (2)                                                                                                  | binuclear building unit                                                    | Tetra- carboxylic acid | 7         |
| [Li(H <sub>2</sub> tatab)]·5H <sub>2</sub> O (3)                                                                                           | chain-like unit                                                            | Di-carboxylic acid     | 7         |
| (H <sub>3</sub> O)[Li <sub>11</sub> (H <sub>2</sub> O) <sub>5</sub> (Htm) <sub>6</sub> ]·8C <sub>4</sub> H <sub>8</sub> O <sub>2</sub> (4) | {Li <sub>11</sub> } unit                                                   | Tri-carboxylic acid    | 7         |
| [Li{Li(nmp)}{Li(H <sub>2</sub> O)(nmp)}{Li(nmp) <sub>2</sub> }(H <sub>2</sub> tms)(Htms) <sub>2</sub> ]·NMP·EtOH (5)                       | Binuclear and mononuclear unit                                             | Tri-carboxylic acid    | 7         |
| CPM-47                                                                                                                                     | helical inorganic chains made of 4-membered and 6-membered rings           | Mono-carboxylic acid   | 8         |
| Li <sub>2</sub> (hba)(DMF) (1)                                                                                                             | chain                                                                      | Mono-carboxylic acid   | 9         |
| Li-NTA                                                                                                                                     | [Li <sub>2</sub> O <sub>4</sub> ] unit                                     | Di-carboxylic acid     | 10        |
| Li <sub>8</sub> -MOF                                                                                                                       | 1D Li <sub>8</sub> -based SBU                                              | Tetra- carboxylic acid | This work |

## Results and Discussion

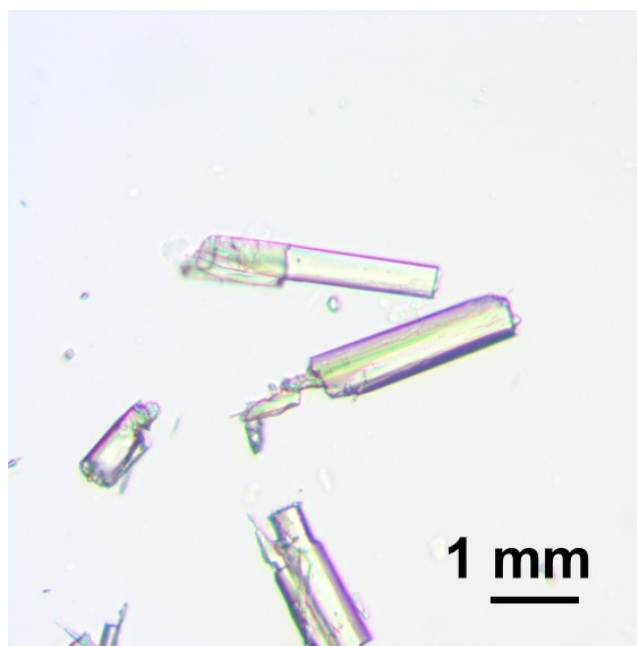

**Figure S1.** The Optical microscope photograph of Li<sub>8</sub>-MOF.

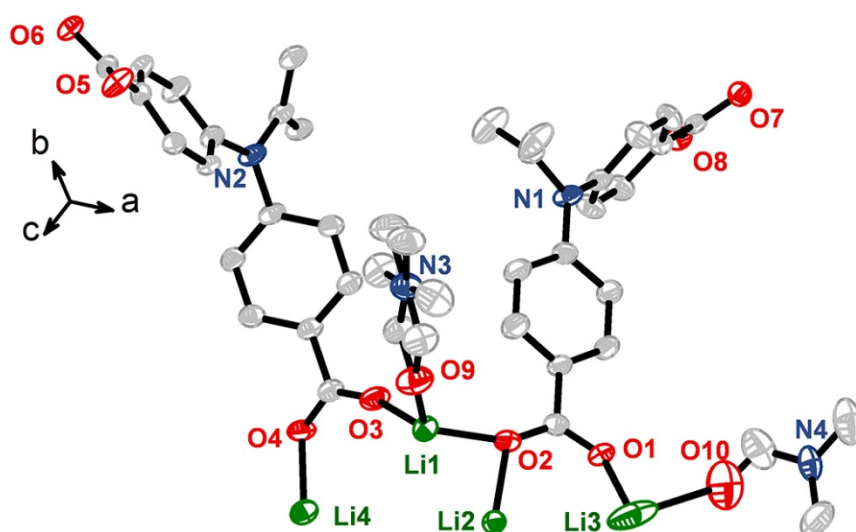

**Figure S2.** The asymmetric unit of Li<sub>8</sub>-MOF. Displacement ellipsoids are drawn at the 50% probability level. Color scheme: Li, green; O, red; C, grey; N, dark blue. The hydrogen atoms are omitted for clarity. The DMF is disordered (where N3 is located). The DMF occupies 0.5 (where N4 is located).

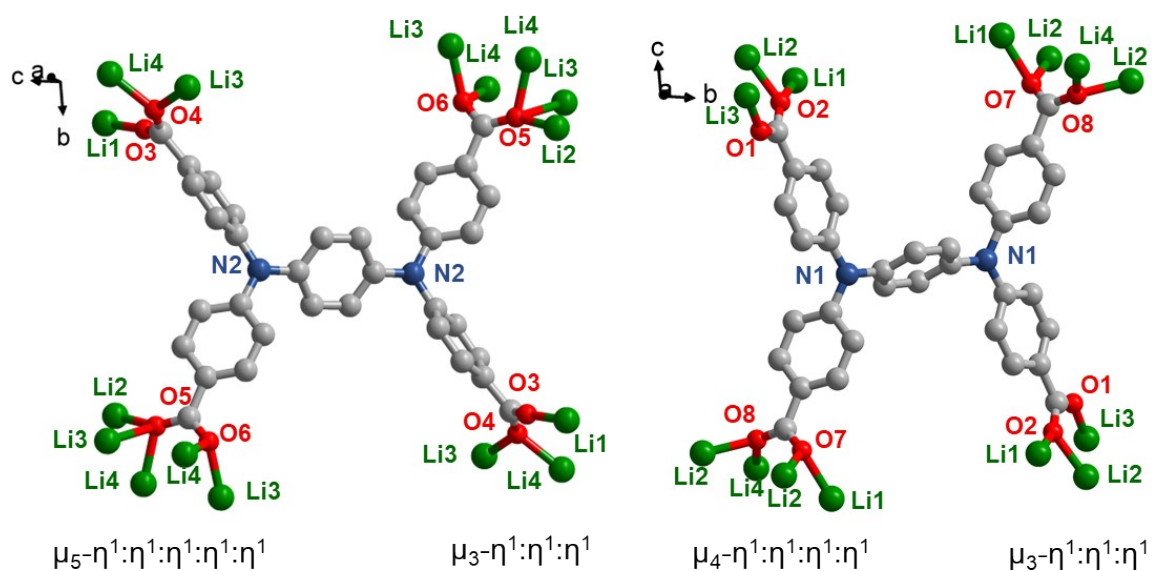

**Figure S3.** The coordination environments of TCPPDA<sup>+</sup>. Color scheme: Li, green; O, red; C, grey; N, dark blue. The hydrogen atoms are omitted for clarity.

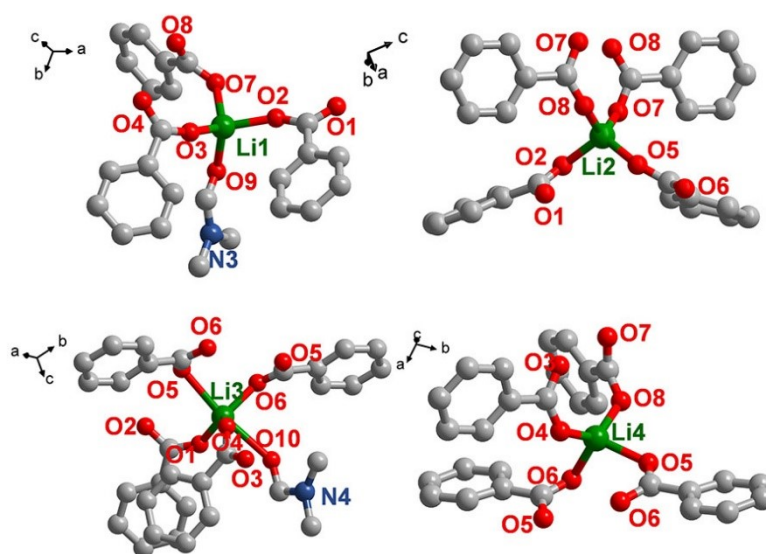

**Figure S4.** The coordination environment of Li<sup>+</sup> ions. Color scheme: Li, green; O, red; C, grey; N, dark blue. The hydrogen atoms are omitted for clarity.



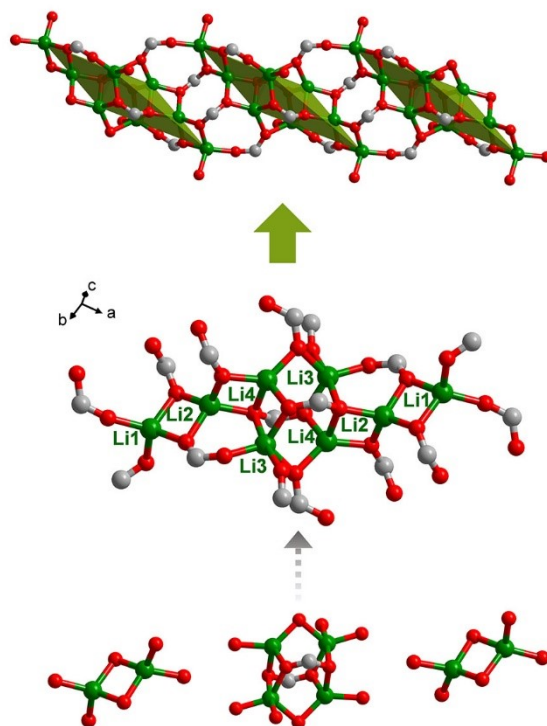

**Figure S5.** The octanuclear cluster and 1D rod SBU. Color scheme: Li, green; O, red; C, grey; N, dark blue. The hydrogen atoms are omitted for clarity.

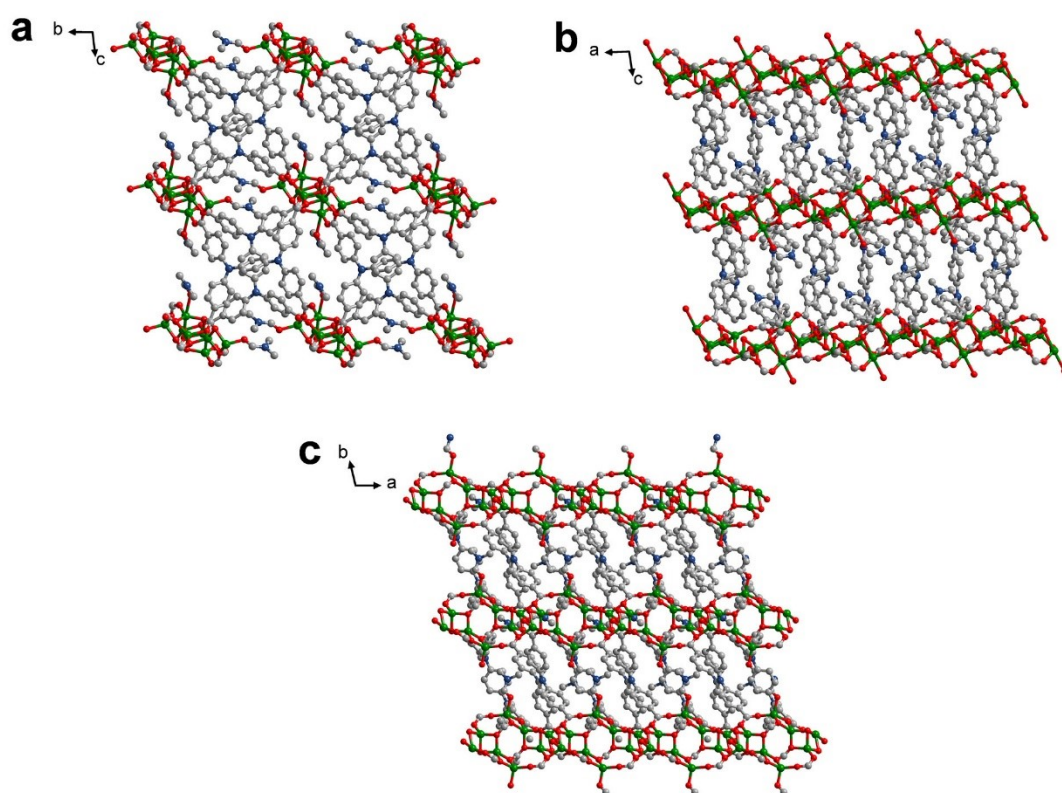

**Figure S6.** The 3D frameworks of Li<sub>8</sub>-MOF are viewed in the (a) a axis, (b) b axis, and (c) c axis. Color scheme: Li, green; O, red; C, grey; N, dark blue. The hydrogen atoms are omitted for clarity.

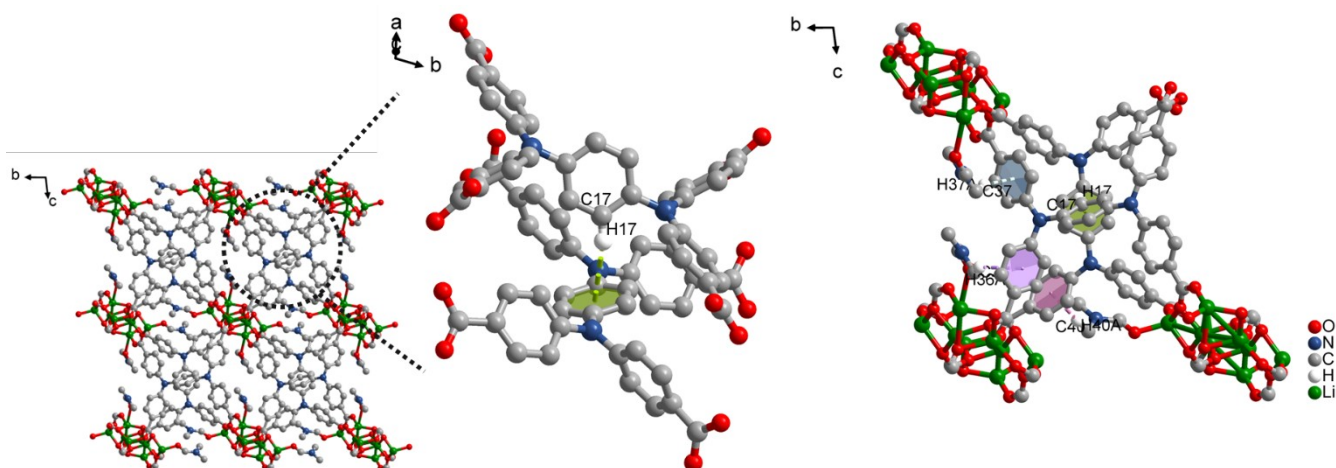

**Figure S7.** The C-H... $\pi$  interactions in the three-dimensional framework of Li<sub>8</sub>-MOF.

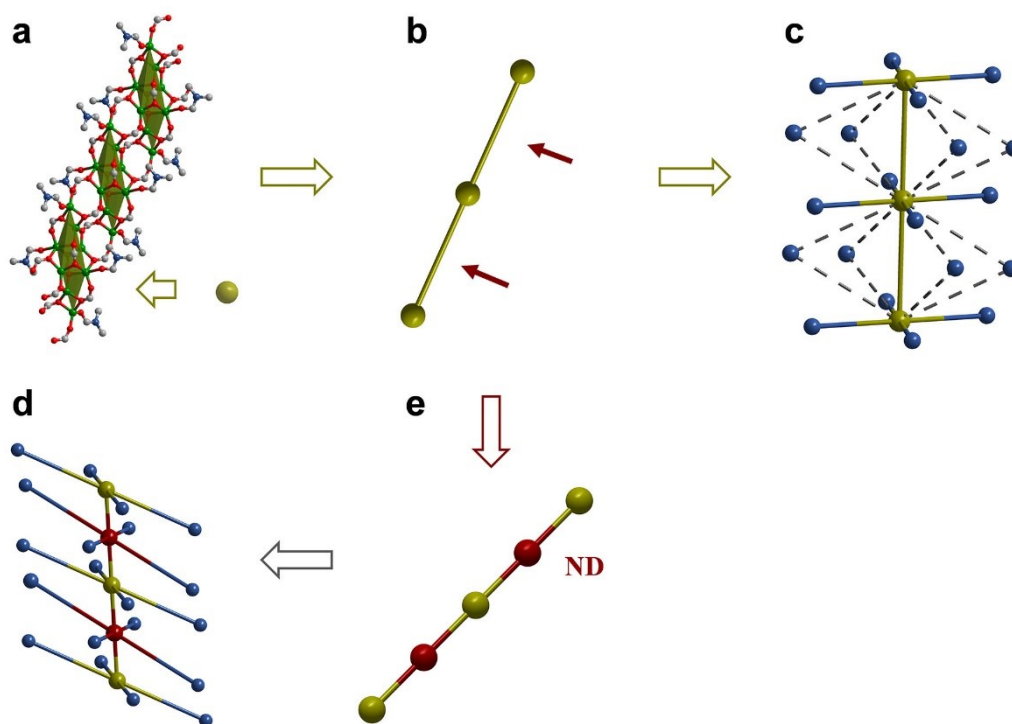

**Figure S8.** (a) Crystallographic representation of Li<sub>8</sub>-based 1D chain. Topologically analysis of (b) cluster-based node, (c) cluster nodes coordinated, (d) cluster nodes and DNs coordinated, (e) Dummy nodes (DNs) are inserted into the centre of cluster nodes.

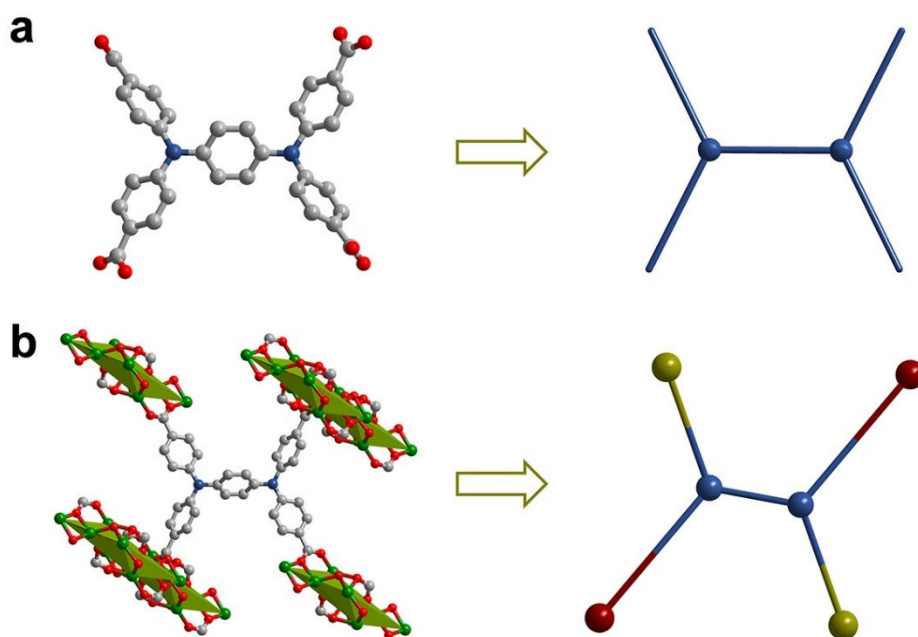

**Figure S9.** Crystallographic representation and topologically analysis of (a) TCPPDA<sup>4-</sup>, (b) TCPPDA<sup>4-</sup> coordinated.

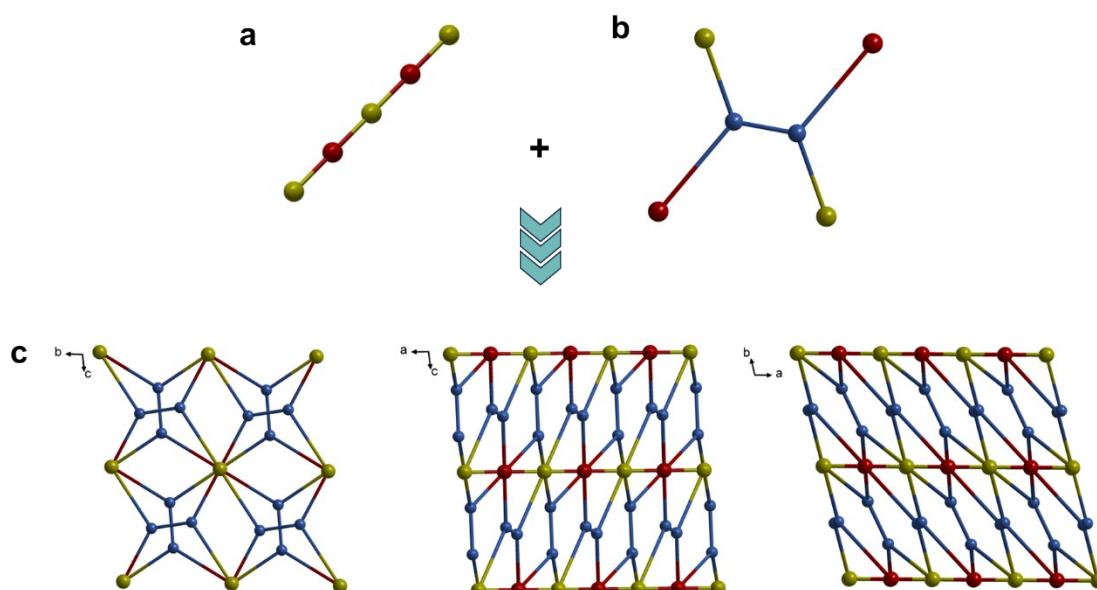

**Figure S10.** Topologically analysis for (a) 1D rod SBUs, (b) TCPPDA<sup>4-</sup>, (c) *a* axis, *b* axis and *c* axis of Lig-MOF.

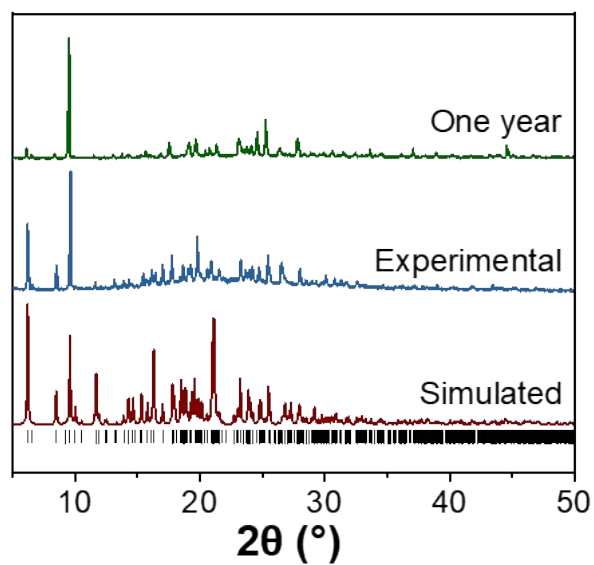

Figure. S11 PXRD patterns of  $\text{Li}_8\text{-MOF}$  stored in air for one year.

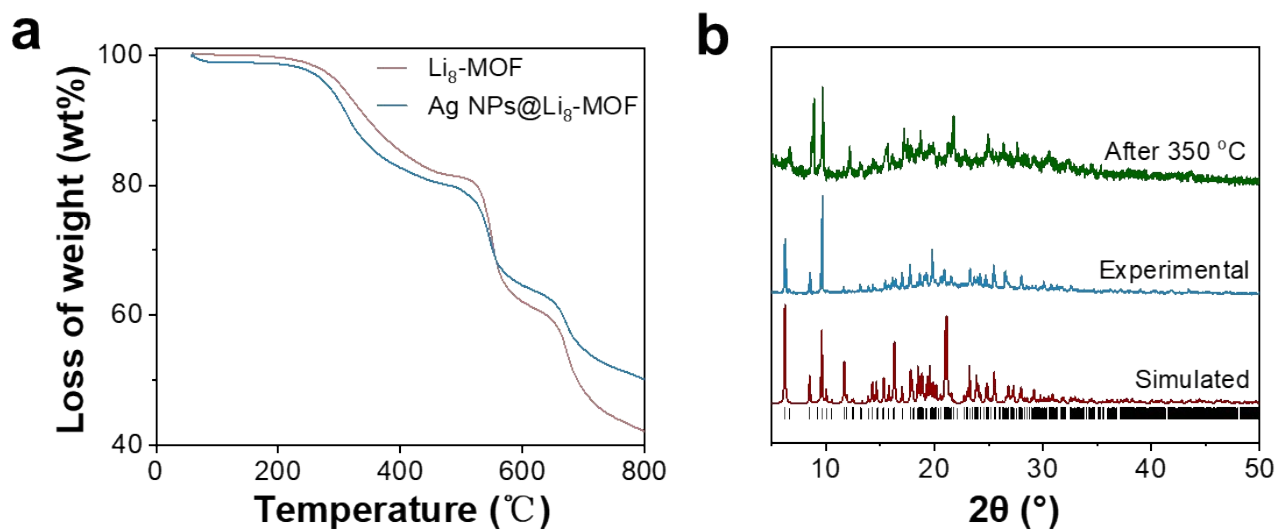

Figure. S12 (a) The TGA plots of  $\text{Li}_8\text{-MOF}$  and  $\text{Ag NPs@Li}_8\text{-MOF}$  in  $\text{N}_2$  atmosphere. (b) The PXRD patterns of  $\text{Li}_8\text{-MOF}$  after being treated in a nitrogen atmosphere at  $350\text{ }^\circ\text{C}$  for 12 h.

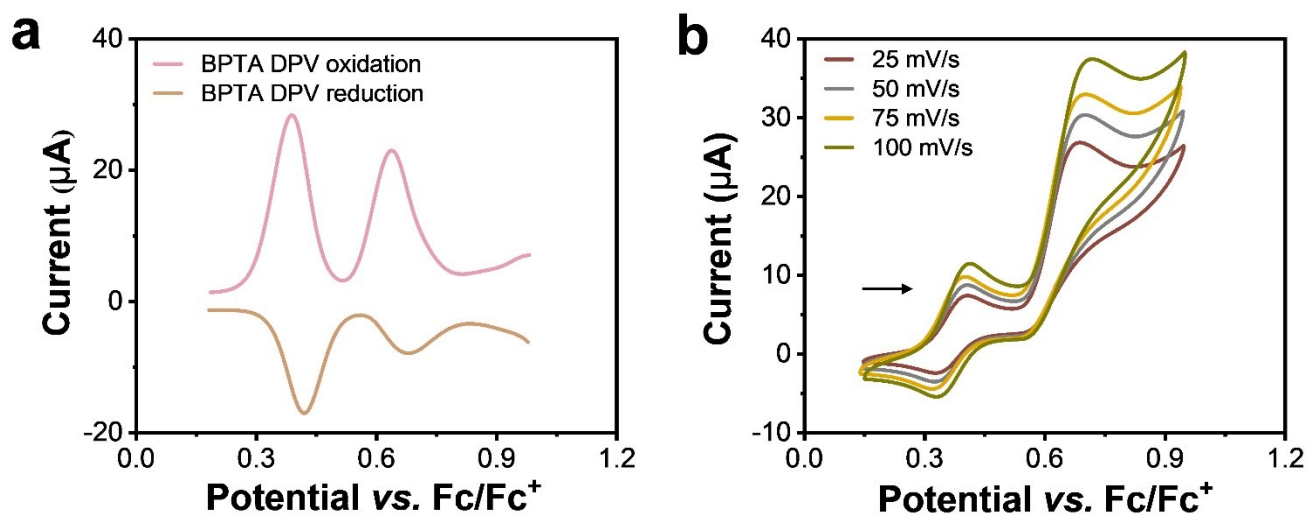

**Figure. S13** Cyclic voltammograms of H<sub>4</sub>TCPPDA ligand as the solution state in 0.1 M (C<sub>2</sub>H<sub>5</sub>)<sub>4</sub>N<sup>+</sup>PF<sub>6</sub><sup>-</sup> /DMF electrolyte. (a) oxidation and reduction peaks from the DPV, (b) scan rates of 25 -100 mV s<sup>-1</sup>.

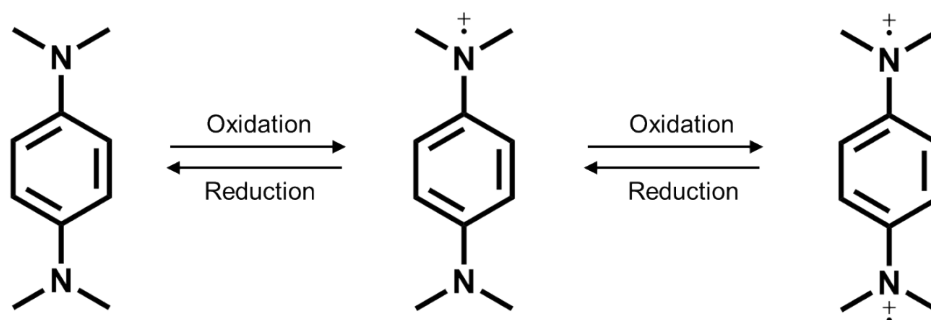

**Figure. S14** Redox processes of H<sub>4</sub>TCPPDA linker.

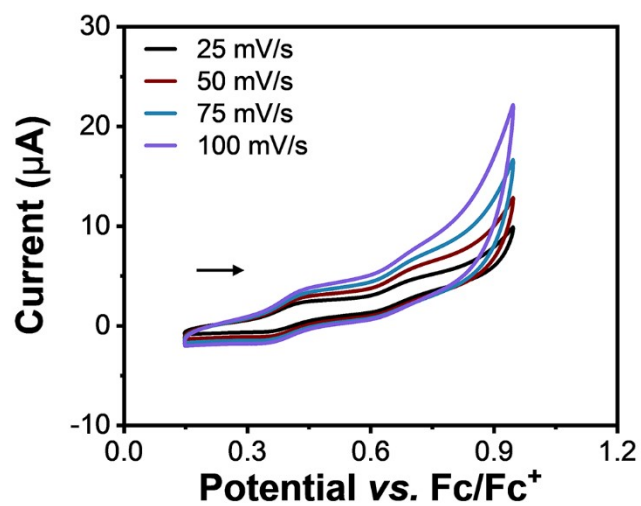

**Figure. S15** Cyclic voltammograms of Li<sub>8</sub>-MOF as the solid state in 0.1 M (C<sub>2</sub>H<sub>5</sub>)<sub>4</sub>N<sup>+</sup>PF<sub>6</sub><sup>-</sup> /DMF electrolyte at scan rates of 25 -100 mV s<sup>-1</sup>.

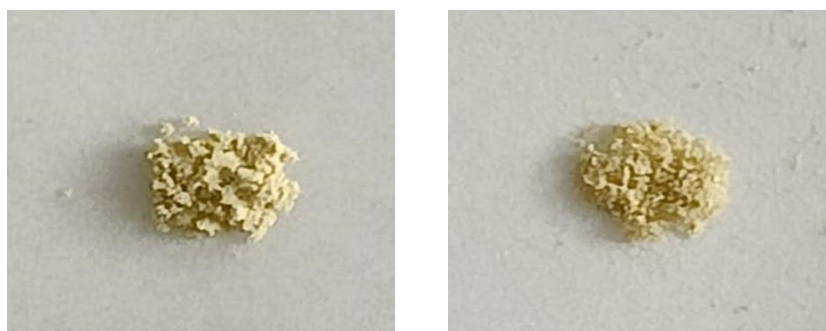

**Figure. S16** Photographs of Li<sub>8</sub>-MOF before (left) and after (right) submerged in a cyclohexane solution of I<sub>2</sub> for 12 hours.

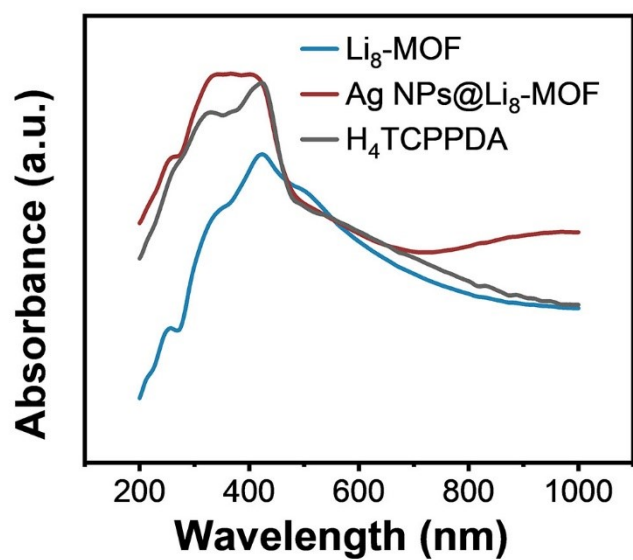

**Figure S17.** The UV-vis-NIR spectra of H<sub>4</sub>TCPPDA, Li<sub>8</sub>-MOF and Ag NPs@ Li<sub>8</sub>-MOF.

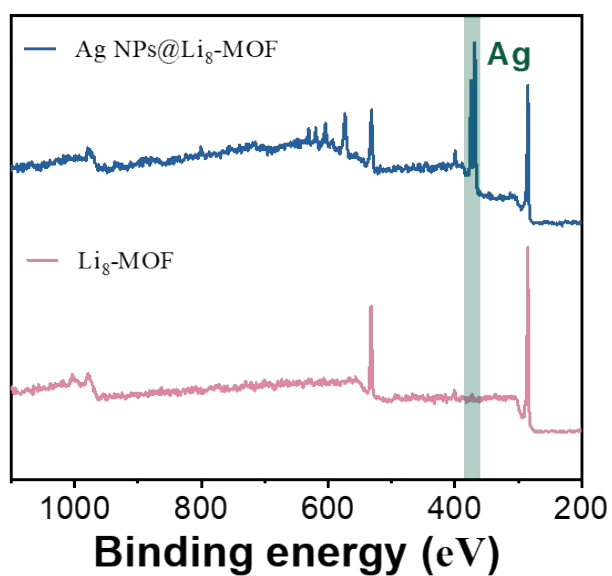

**Figure S18.** X-ray photoelectron spectra of Li<sub>8</sub>-MOF, Ag NPs@Li<sub>8</sub>-MOF (0.1 M AgNO<sub>3</sub> 8 h).



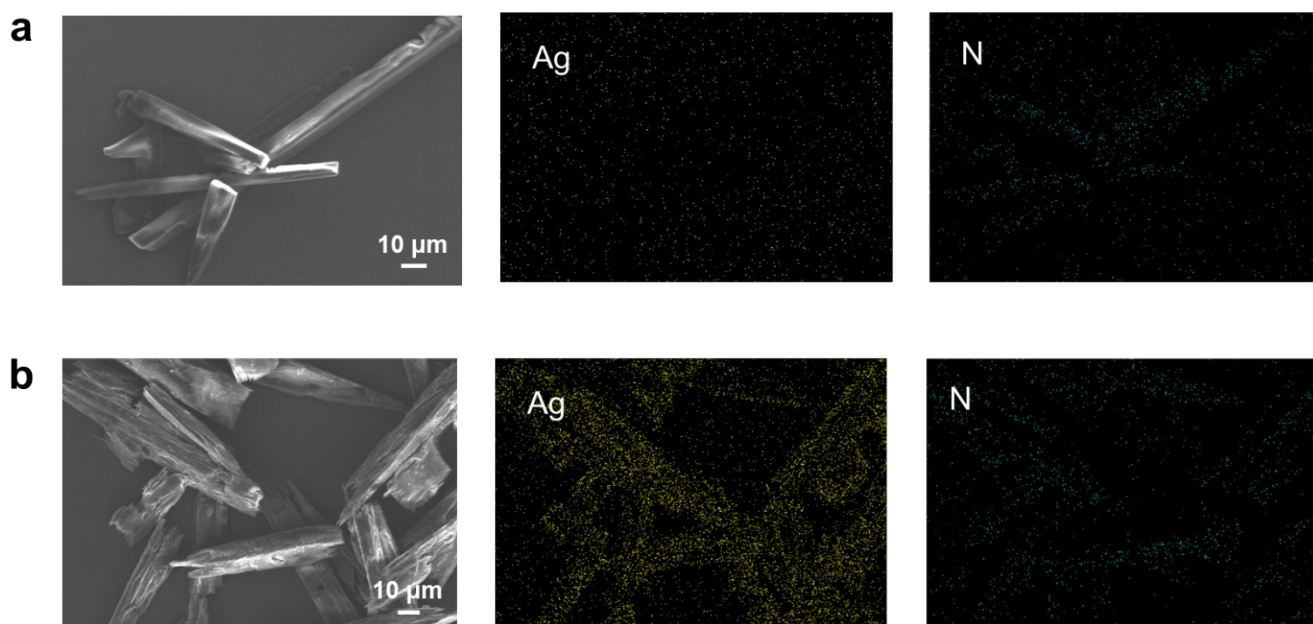

**Figure. S19** Element mapping of  $\text{Li}_8\text{-MOF}$  and  $\text{Ag NPs}@Li_8\text{-MOF}$  (0.1 M  $\text{AgNO}_3$  8 h) under SEM/EDX.

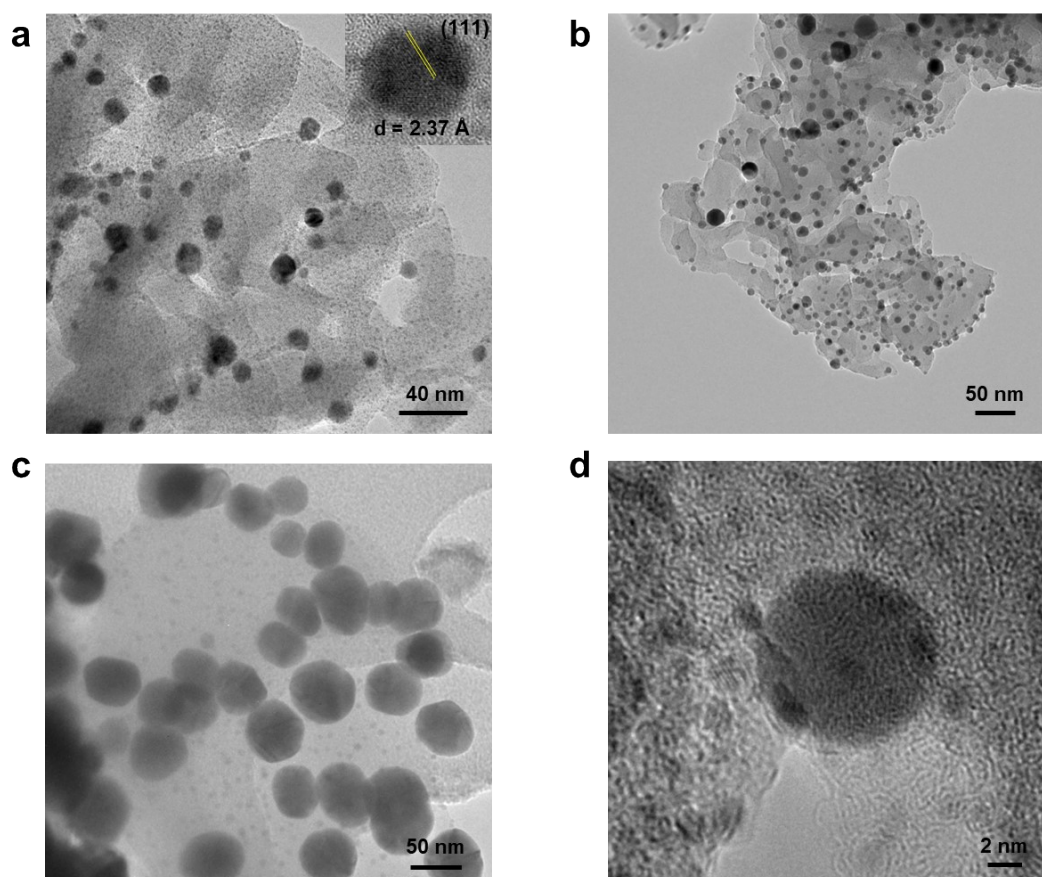

**Figure. S20** HRTEM images of  $\text{Ag NPs}@Li_8\text{-MOF}$  (0.1 M  $\text{AgNO}_3$  8 h).



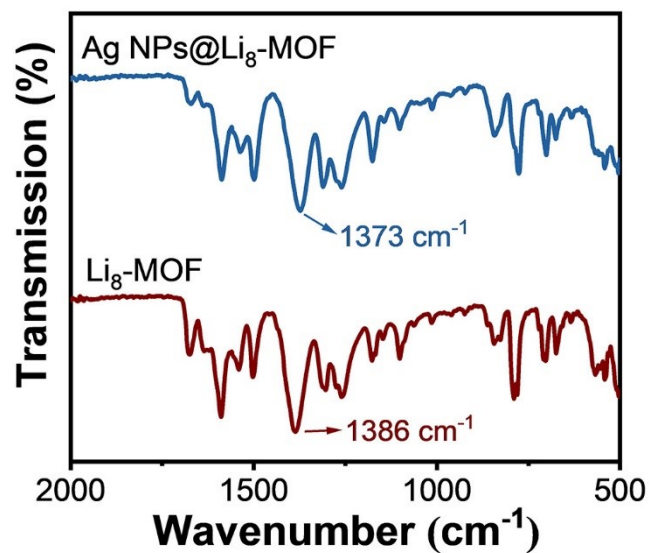

**Figure S21.** The IR spectra of  $\text{Li}_8\text{-MOF}$  and  $\text{Ag NPs@Li}_8\text{-MOF}$ . The shifted peak (around  $1373\text{ cm}^{-1}$ ) can be attributed to the vibration of  $\text{NO}_3^-$ .

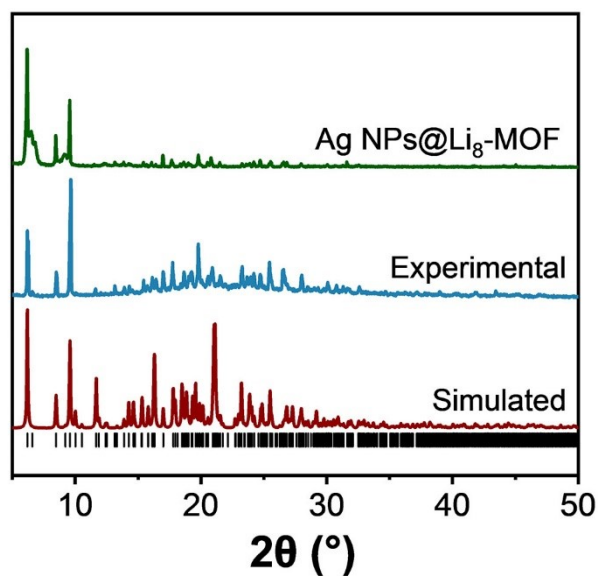

**Figure. S22** The PXRD patterns of  $\text{Ag NPs@Li}_8\text{-MOF}$  resulting from immersion of the material in  $0.01\text{ M AgNO}_3$  for 8h in  $\text{CH}_3\text{OH}$ .

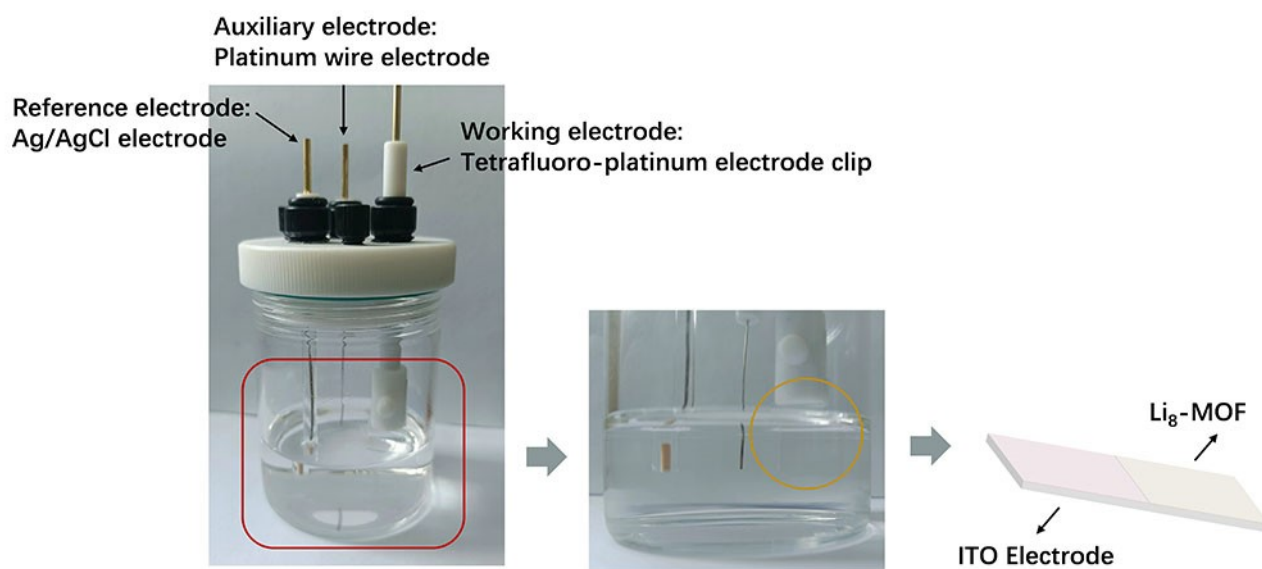

**Figure. S23** Schematic diagram of electrochromic device.

## References

- [1] Z. Wei, Z.-Y. Gu, R. K. Arvapally, Y.-P. Chen, R. N. McDougald, Jr., J. F. Ivy, A. A. Yakovenko, D. Feng, M. A. Omary, H.-C. Zhou, Rigidifying Fluorescent Linkers by Metal–Organic Framework Formation for Fluorescence Blue Shift and Quantum Yield Enhancement. *J. Am. Chem. Soc.* **2014**, 136, 8269-8276.
- [2] C. Gorbitz, What Is the Best Crystal Size for Collection of X-Ray Data? Refinement of the Structure of Glycyl-L-Serine Based on Data from a Very Large Crystal. *Acta Crystallogr. B* **1999**, 55, 1090-1098.
- [3] G. Sheldrick, A Short History of Shelx. *Acta Cryst. A* **2008**, 64, 112-122.
- [4] A. Spek, Single-Crystal Structure Validation with the Program Platon. *J. Appl. Crystallogr.* **2003**, 36, 7-13.
- [5] D. Pugh, E. Ashworth, K. Robertson, L. C. Delmas, A. J. P. White, P. N. Horton, G. J. Tizzard, S. J. Coles, P. D. Lickiss, R. P. Davies, Metal–Organic Frameworks Constructed from Group 1 Metals (Li, Na) and Silicon-Centered Linkers. *Cryst. Growth Des.*, **2019**, 19, 487-497.
- [6] B. F. Abrahams, M. J. Grannas, T. A. Hudson, R. Robson, A Simple Lithium(I) Salt with a Microporous Structure and Its Gas Sorption Properties. *Angew. Chem. Int. Ed.*, **2010**, 49, 1087-1089.
- [7] S. B. Aliev, D. G. Samsonenko, M. I. Rakhmanova, D. N. Dybtsev, V. P. Fedin, Syntheses and Structural Characterization of Lithium Carboxylate Frameworks and Guest-Dependent Photoluminescence Study. *Cryst. Growth Des.*, **2014**, 14, 4355-4363.
- [8] X. Zhao, M. S. Shimazu, X. T. Chen, X. H. Bu, P. Y. Feng, Homo-Helical Rod Packing as a Path Toward the Highest Density of Guest-Binding Metal Sites in Metal–Organic Frameworks. *Angew. Chem. Int. Ed.*, **2018**, 57, 6208-6211.
- [9] B. F. Abrahams, C. J. Commons, A. D. Dharma, T. A. Hudson, R. Robson, R. W. S. Arlt, T. C. Stewart, K. F. White, Synthesis, structure and properties of coordination polymers formed from bridging 4-hydroxybenzoic acid anions. *CrystEngComm*, **2022**, 24, 1924-1933.
- [10] A. V. Desai, V. Pimenta, C. King, D. B. Cordes, A. M. Z. Slawin, R. E. Morris, A. R. Armstrong, Conversion of a microwave synthesized alkali-metal MOF to a carbonaceous anode for Li-ion batteries. *RSC Adv.*, **2020**, 10, 13732-13736.
